# Bacteriophage Lysin Mediates the Binding of *Streptococcus mitis* to Human Platelets through Interaction with Fibrinogen

Ho Seong Seo<sup>1</sup>, Yan Q. Xiong<sup>2</sup>, Jennifer Mitchell<sup>3</sup>, Ravin Seepersaud<sup>1</sup>, Arnold S. Bayer<sup>2</sup>, Paul M. Sullam<sup>1\*</sup>

**1** Division of Infectious Diseases, Veterans Affairs Medical Center and the University of California, San Francisco, California, United States of America, **2** Division of Infectious Diseases, Harbor-UCLA Medical Center, Torrance, California, United States of America, **3** University College, Dublin, Ireland

## Abstract

The binding of bacteria to human platelets is a likely central mechanism in the pathogenesis of infective endocarditis. We have previously found that platelet binding by *Streptococcus mitis* SF100 is mediated by surface components encoded by a lysogenic bacteriophage, SM1. We now demonstrate that SM1-encoded lysin contributes to platelet binding via its direct interaction with fibrinogen. Far Western blotting of platelets revealed that fibrinogen was the major membrane-associated protein bound by lysin. Analysis of lysin binding with purified fibrinogen *in vitro* confirmed that these proteins could bind directly, and that this interaction was both saturable and inhibitable. Lysin bound both the A $\alpha$  and B $\beta$  chains of fibrinogen, but not the  $\gamma$  subunit. Binding of lysin to the B $\beta$  chain was further localized to a region within the fibrinogen D fragment. Disruption of the SF100 *lysin* gene resulted in an  $83 \pm 3.1\%$  reduction (mean  $\pm$  SD) in binding to immobilized fibrinogen by this mutant strain (PS1006). Preincubation of this isogenic mutant with purified lysin restored fibrinogen binding to wild type levels. When tested in a co-infection model of endocarditis, loss of lysin expression resulted in a significant reduction in virulence, as measured by achievable bacterial densities (CFU/g) within vegetations, kidneys, and spleens. These results indicate that bacteriophage-encoded lysin is a multifunctional protein, representing a new class of fibrinogen-binding proteins. Lysin appears to be cell wall-associated through its interaction with choline. Once on the bacterial surface, lysin can bind fibrinogen directly, which appears to be an important interaction for the pathogenesis of endocarditis.

**Citation:** Seo HS, Xiong YQ, Mitchell J, Seepersaud R, Bayer AS, et al. (2010) Bacteriophage Lysin Mediates the Binding of *Streptococcus mitis* to Human Platelets through Interaction with Fibrinogen. PLoS Pathog 6(8): e1001047. doi:10.1371/journal.ppat.1001047

**Editor:** Michael S. Gilmore, Harvard Medical School, United States of America

**Received:** April 13, 2010; **Accepted:** July 15, 2010; **Published:** August 12, 2010

This is an open-access article distributed under the terms of the Creative Commons Public Domain declaration which stipulates that, once placed in the public domain, this work may be freely reproduced, distributed, transmitted, modified, built upon, or otherwise used by anyone for any lawful purpose.

**Funding:** This work is supported by the Department of Veterans Affairs (PMS), NIH R01-AI41513 (PMS), R01-AI057433 (PMS), and R01-AI039108 (ASB). The funders had no role in study design, data collection and analysis, decision to publish, or preparation of the manuscript.

**Competing Interests:** The authors have declared that no competing interests exist.

\* E-mail: paul.sullam@ucsf.edu

## Introduction

The pathogenesis of infective endocarditis is a complex process, involving numerous host-pathogen interactions [1,2]. A key interaction for disease establishment and progression is the binding of microbes to human components, including platelets, fibrinogen, fibrin, and fibronectin [3,4,5,6,7,8]. Although this binding appears to be a central requirement for virulence, only a limited number of endocarditis-related adhesins has been identified [7,8,9].

Among the viridans group streptococci, *Streptococcus mitis* is a leading cause of endovascular infection [10,11,12,13,14]. Despite its increasing importance as a human pathogen, relatively little is known about the virulence determinants of this organism, particularly with regard to its interaction with platelets or other host components. Our previous studies identified two surface proteins (PblA and PblB) encoded by a lysogenic bacteriophage (SM1) that mediate the binding of *S. mitis* to human platelets, through their interaction with the membrane ganglioside GD3 [15,16,17]. Disruption of the genes encoding PblA and PblB results in a significant decrease in platelet binding *in vitro*, as well as a marked reduction in virulence, as measured by an animal model of endocarditis [16,17].

Expression of these proteins on the bacterial surface is dependent upon the activities of phage holin and lysin, which permeabilize the cell envelope, thereby permitting the transport of PblA and PblB to the cell wall, where they attach to phosphocholine (PC) residues [16]. Of note, disruption of the gene encoding lysin (*lys*) resulted in a profound reduction in platelet binding, to levels that were significantly lower than those seen with either the parent strain, or a *pblA/pblB* double knock-out mutant [16]. These findings suggested that lysin mediates platelet binding in part through a mechanism independent of its role in the export of PblA and PblB.

For these reasons, we investigated the mechanisms by which lysin mediates binding to platelets, and whether this interaction contributes to the pathogenesis of streptococcal endocarditis. Our studies indicate that phage lysin can be localized on the bacterial surface through its interaction with PC residues. Surface-bound lysin can subsequently bind both free and platelet-associated fibrinogen, through its specific interaction with the A $\alpha$  and B $\beta$  chains of the protein. Loss of lysin expression is associated with reduced virulence in the setting of endocarditis, indicating that the binding of lysin to fibrinogen is an important factor in the pathogenesis of this infection.

## Author Summary

The binding of bacteria to human platelets is thought to be a central event in the development of endocarditis (a life-threatening cardiovascular infection). We have previously found that platelet binding by *Streptococcus mitis* is mediated by surface components encoded by a bacteriophage contained within the host bacterium. We now show that lysin (an enzyme of bacteriophage origin) contributes to platelet binding via its direct interaction with fibrinogen on the platelet surface. Lysin bound to purified fibrinogen *in vitro*, and this interaction specifically involved the  $\alpha$  and  $\beta$  chains of fibrinogen. Binding of lysin to the  $\beta$  chain was further localized to a region within the fibrinogen D fragment. Disruption of the gene encoding lysin gene resulted in a significant reduction in binding to fibrinogen by *S. mitis*, as well as a major reduction in virulence, as measured by a rat model of endocarditis. These results indicate that lysin is a multifunctional protein, representing a new class of fibrinogen-binding molecules. Lysin is localized to the bacterial surface via its interaction with cell wall choline, where it then can bind fibrinogen directly. Cell surface lysin apparently also contributes to the development of endovascular infections via its previously unrecognized fibrinogen binding activity.

## Results

### Characterization of lysin<sub>SM1</sub> from bacteriophage SM1

Using the NCBI Conserved Domain Database (CDD) search system [18], bioinformatic analysis of the predicted amino acid sequence of lysin<sub>SM1</sub> (Accession number Q9AF60), revealed that an amidase-5 domain (Pfam05382; amino acids 4–146) is present at the amino terminus, and a putative choline-binding domain is found at the carboxyl terminus (COG5263; amino acids 128–271; Fig. 1). The N-terminal domain of lysin<sub>SM1</sub> (N-lysin<sub>SM1</sub>) exhibits 75% amino acid identity to the Pal lysin (accession number O03979) of the pneumococcal bacteriophage Dp-1, and 74% identity to the lysin (accession number Q8E0W3) of the prophage lambdaSa1 of *Streptococcus agalactiae* [19,20]. The C terminus of lysin<sub>SM1</sub> (C-lysin<sub>SM1</sub>) contains a choline-binding domain homologous to that found in the pneumococcal LytA autolytic enzyme

(62% identity), which anchors the protein to PC residues present in LTA or teichoic acids [19].

To assess whether lysin<sub>SM1</sub> demonstrated its predicted biological activities, we first examined its binding to DEAE-cellulose, a property that is a hallmark of choline-binding proteins [21]. Lysin<sub>SM1</sub>, N-lysin<sub>SM1</sub>, and C-lysin<sub>SM1</sub> were expressed individually in *Escherichia coli*, and lysates from these strains were applied to a DEAE-cellulose column [16]. N-lysin<sub>SM1</sub> failed to bind the matrix, with the protein being detected in the wash volumes (Fig. 2A). In contrast, lysin<sub>SM1</sub> and C-lysin<sub>SM1</sub> were only eluted with <sup>TM</sup> buffer containing 2% choline chloride. Thus, lysin<sub>SM1</sub> appears to be a choline-binding protein, with this interaction being mediated by the C terminus.

We then examined whether purified lysin<sub>SM1</sub> bound directly to PC residues of LTA purified from *S. pneumoniae* HS0001 and *S. mitis* SF100. Purified FLAG-lysin<sub>SM1</sub> was incubated with immobilized LTAs, and binding was assessed by ELISA with anti-FLAG antibody. As shown in Fig. 2B, lysin<sub>SM1</sub> bound LTA from *S. mitis* SF100 and from *S. pneumoniae* HS0001, both of which contain PC. Of note, binding levels of lysin<sub>SM1</sub> to these LTAs were comparable and concentration-dependent. In contrast, little or no binding to LTA was detected from strain HS0001-EA, which has no PC. C-lysin<sub>SM1</sub> also bound LTA from SF100 and HS0001, whereas N-lysin<sub>SM1</sub> did not (Figure S1). These results confirm that lysin<sub>SM1</sub> interacts with the PC residues of LTA, and that binding is mediated by the predicted choline-binding domain within the C terminus.

As mentioned above, analysis of the predicted amino terminus of lysin<sub>SM1</sub> indicated that it encodes an amidase with g-D-glutamyl-L-lysine endopeptidase activity [20]. To assess its lytic activity, we tested the bactericidal properties of lysin<sub>SM1</sub> *in vitro* (Fig. 2C). When compared with organisms treated with buffer alone, exposure of *S. pneumoniae* HS0001 to lysin<sub>SM1</sub> resulted in a mean ( $\pm$  S.D.) reduction of  $5.07 \pm 1.28 \log_{10}$  CFU per ml ( $P < 0.05$ ). Lysin<sub>SM1</sub> was also active against the SM1 host strain SF100 and its isogenic variant, PS1006, though it only reduced mean titers by  $0.8 \pm 0.04$  ( $P < 0.05$ ) and  $1.65 \pm 0.21 \log_{10}$  CFU per ml ( $P < 0.05$ ), respectively. No bactericidal activity was seen when tested against *Staphylococcus aureus*, *Streptococcus sanguinis*, *Streptococcus pyogenes*, or *E. coli*. Of note, neither purified N-lysin<sub>SM1</sub> nor C-lysin<sub>SM1</sub> had bactericidal activity against strains HS0001 or SF100 (data not shown). Thus, lysin<sub>SM1</sub> has lytic activity against PC positive strains, such as *S. mitis* and *S. pneumoniae*, though the latter

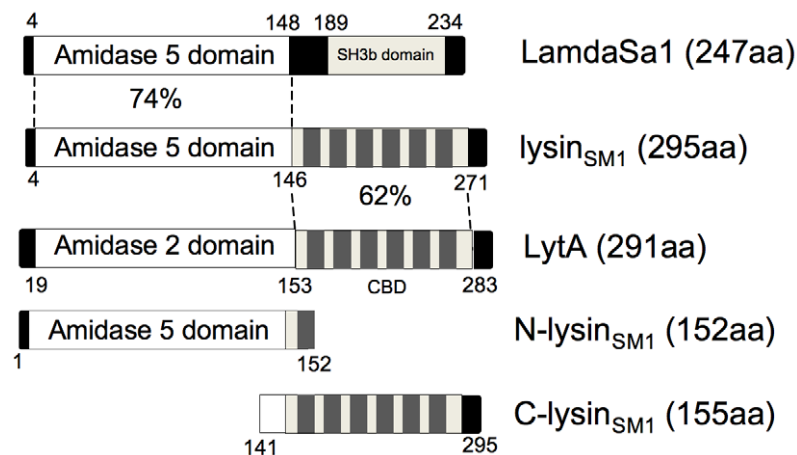

**Figure 1. Domain organization of lysin<sub>SM1</sub> and its homologs.** Domains of lysin<sub>SM1</sub> are compared with its closest homologs, the lambdaSa1 phage lysin of *Streptococcus agalactiae* and the LytA autolyisin of *Streptococcus pneumoniae*, using the NCBI BLAST search program. Levels of identity between regions are indicated. Also shown are the alignments of the amino (N-lysin<sub>SM1</sub>) and carboxyl terminal (C-lysin<sub>SM1</sub>) truncated form of lysin<sub>SM1</sub>. CBD: choline-binding domain. SH3b: putative bacterial cell wall-binding domain. doi:10.1371/journal.ppat.1001047.g001

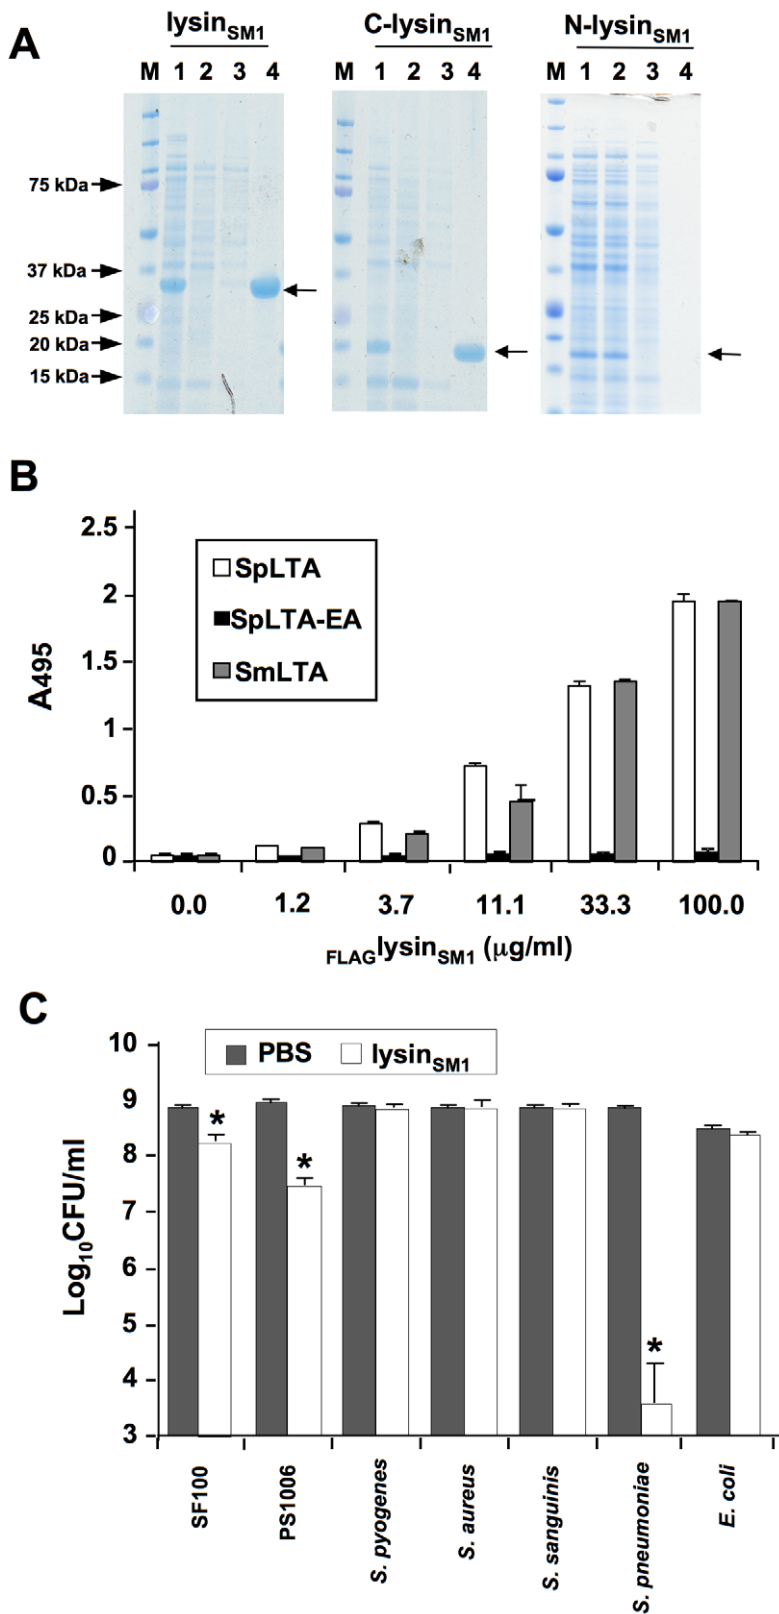

**Figure 2. Lysin binding to phosphocholine (PC) residue and its biological activity.** (A) Binding of lysin<sub>SM1</sub> and its truncated forms to DEAE-cellulose. Samples were separated by SDS-PAGE and stained with Coomassie blue. M: MW standards; lane 1: whole cell extracts of *E. coli* expressing indicated protein; lane 2: proteins not retained by DEAE cellulose column; lane 3: proteins eluted with 1.5 M NaCl - 0.1% choline chloride; lane 4: proteins eluted with 2% choline chloride. Arrows indicate position of expressed proteins. (B) Binding of FLAG-lys<sub>SM1</sub> to immobilized LTA from *Streptococcus pneumoniae* (SpLTA), PC-negative pneumococci (SpLTA-EA), or *Streptococcus mitis* (SmLTA). Bars indicate the means ( $\pm$  S.D.) of triplicate results in a representative experiment. (C) Bactericidal activity of lysin<sub>SM1</sub>. Values shown are number of surviving bacteria after exposure to lysin<sub>SM1</sub> or buffer (mean  $\pm$  S.D.). \* =  $P < 0.05$ , compared with the same strain exposed to buffer alone. doi:10.1371/journal.ppat.1001047.g002

species is considerably more sensitive to the enzyme. Moreover, lysin<sub>SM1</sub> requires its choline-binding domain, in addition to its predicted amidase domain, for this activity.

### Binding of recombinant lysin<sub>SM1</sub> to human platelets

We have previously observed that disruption of the gene encoding lysin<sub>SM1</sub> resulted in a significant reduction in platelet binding by *S. mitis* [16]. To assess whether lysin<sub>SM1</sub> could interact directly with human platelets, we evaluated the binding of FLAG-lysin<sub>SM1</sub> to immobilized human platelets and to isolated platelet membranes (Fig. 3A). FLAG-lysin<sub>SM1</sub> was incubated with platelet monolayers or platelet membranes, and bound FLAG-lysin<sub>SM1</sub> was then detected with anti-FLAG antibody. When tested by this approach, we found that FLAG-lysin<sub>SM1</sub> strongly interacted with both whole platelets and platelet membranes in a concentration-dependent manner. In contrast, no binding of FLAG-lysin<sub>SM1</sub> was seen to wells coated with only a casein-based blocking reagent (Western Blocking Reagent; Roche).

To identify the membrane receptor for lysin<sub>SM1</sub>, we assessed by far Western blotting the binding of FLAG-lysin<sub>SM1</sub> to platelet membranes that had undergone SDS-PAGE and transfer to nitrocellulose (Fig. 3B). Although the platelet membrane extracts contained numerous proteins, ranging in mass from 50 to 250 kDa, FLAG-lysin<sub>SM1</sub> bound only a small number of proteins. The highest levels of binding were seen with two proteins of MW 65 kDa and 55 kDa, which were similar to the molecular masses of the A $\alpha$  and B $\beta$  chains of human fibrinogen (64 and 56 kDa), respectively. To confirm that platelet membrane extracts contained fibrinogen, the preparations were probed with antibodies directed against the three major chains of fibrinogen (A $\alpha$ , B $\beta$  and  $\gamma$ ). As shown Fig. 3B, each subunit of fibrinogen was present in the membrane extracts. To directly confirm that lysin<sub>SM1</sub> bound fibrinogen on platelet membranes, we assessed whether lysin<sub>SM1</sub> binding to immobilized platelet membranes was inhibited by anti-human fibrinogen IgG. As shown in Fig. 3C, pre-treatment of membranes with 30 or 100  $\mu$ g/ml of anti-fibrinogen antibodies significantly reduced subsequent lysin binding. These results further indicate that fibrinogen is the principal component on platelet membranes and that lysin<sub>SM1</sub> is bound to platelet membranes through its interaction with fibrinogen.

### Binding of lysin<sub>SM1</sub> to fibrinogen

Since fibrinogen is a key factor in the pathogenesis of infective endocarditis, and because it is a receptor for some bacterial adhesins [7,22,23,24,25,26], we further investigated the interaction of this protein with lysin<sub>SM1</sub>. We first assessed the binding of the increasing concentrations of FLAG-lysin<sub>SM1</sub> to human fibrinogen (3  $\mu$ g/ml) immobilized in microtiter wells. In control studies, no significant binding of fibrinogen by FLAG-tagged alkaline phosphatase (FLAG-AP) was detected (Figure S2). In contrast, FLAG-lysin<sub>SM1</sub> showed significant binding to immobilized fibrinogen, which increased in direct proportion to the amount of protein applied (Fig. 4A). At concentrations above 125  $\mu$ g/ml FLAG-lysin<sub>SM1</sub>, binding reached a plateau, indicating that it was saturated. In addition, the binding of FLAG-lysin<sub>SM1</sub> to immobilized fibrinogen was effectively blocked by both unlabeled lysin<sub>SM1</sub> and fibrinogen (Fig. 4B). Similar levels of lysin binding were seen with rat fibrinogen, the host used for our subsequent virulence assays (Figure S3).

For some bacteria, binding to fibrinogen is dependent on whether the protein is in solution or immobilized on a surface. For example, Group A and G streptococci can bind both soluble and immobilized forms of fibrinogen, whereas several oral streptococci appear to bind only immobilized fibrinogen [27,28,29]. To assess whether fibrinogen binding by lysin<sub>SM1</sub> was phase-dependent, we reversed the binding conditions, such that FLAG-lysin<sub>SM1</sub>, untagged lysin<sub>SM1</sub>, and FLAG-AP (all at 10  $\mu$ g/ml) were immobilized in microtiter wells, and probed with the increasing concentration of fibrinogen in solution. Under these conditions, fibrinogen was still found to bind lysin<sub>SM1</sub> and FLAG-lysin<sub>SM1</sub> comparably, whereas no significant binding to FLAG-AP was detected (Fig. 4C).

As noted above, we found that lysin<sub>SM1</sub> bound two proteins associated with platelet membranes that corresponded to the A $\alpha$  and B $\beta$  chains of fibrinogen. To confirm that lysin<sub>SM1</sub> binds specifically to these subunits, we assessed by far Western blotting the interaction of lysin<sub>SM1</sub> with purified human fibrinogen (Fig. 4D). When separated by SDS-PAGE under reducing conditions, fibrinogen appeared as three bands, having the expected masses. When transferred to nitrocellulose and probed with FLAG-lysin<sub>SM1</sub>, binding could be detected to the A $\alpha$  and B $\beta$  chains only, confirming the results seen with platelet membranes.

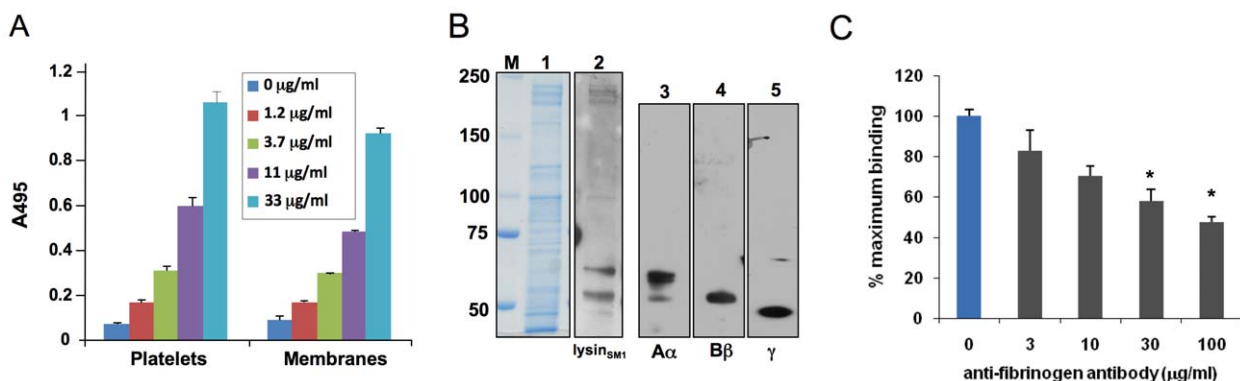

**Figure 3. Lysin binding to platelet monolayers and platelet membranes.** (A) Immobilized human platelets or platelet membranes were incubated with the indicated concentrations of purified FLAG-lysin<sub>SM1</sub>, washed, and bound FLAG-lysin<sub>SM1</sub> was assessed by ELISA. Bars indicate the means ( $\pm$  S.D.) of triplicate data from a representative experiment. (B) Lysin<sub>SM1</sub> binding to platelet membrane proteins (far Western blotting). Proteins were either stained with Coomassie blue (panel 1), or transferred to nitrocellulose membranes and probed with FLAG-lysin<sub>SM1</sub> (panel 2). Platelet membrane proteins were probed with anti-fibrinogen A $\alpha$  chain (panel 3), anti-fibrinogen B $\beta$  chain (panel 4), or anti-fibrinogen  $\gamma$  chain (panel 5) polyclonal antibodies. (C) Inhibition of FLAG-lysin<sub>SM1</sub> binding to platelet membranes by fibrinogen IgG polyclonal antibody. Immobilized platelet membranes were incubated with the indicated concentrations of rabbit anti-fibrinogen IgG prior to testing for binding by FLAG-lysin<sub>SM1</sub> (5  $\mu$ g/ml). Bars indicate the means ( $\pm$  S.D.) of triplicate results from a representative experiment. \* =  $P < 0.05$ , compared with no antibody treatment. doi:10.1371/journal.ppat.1001047.g003

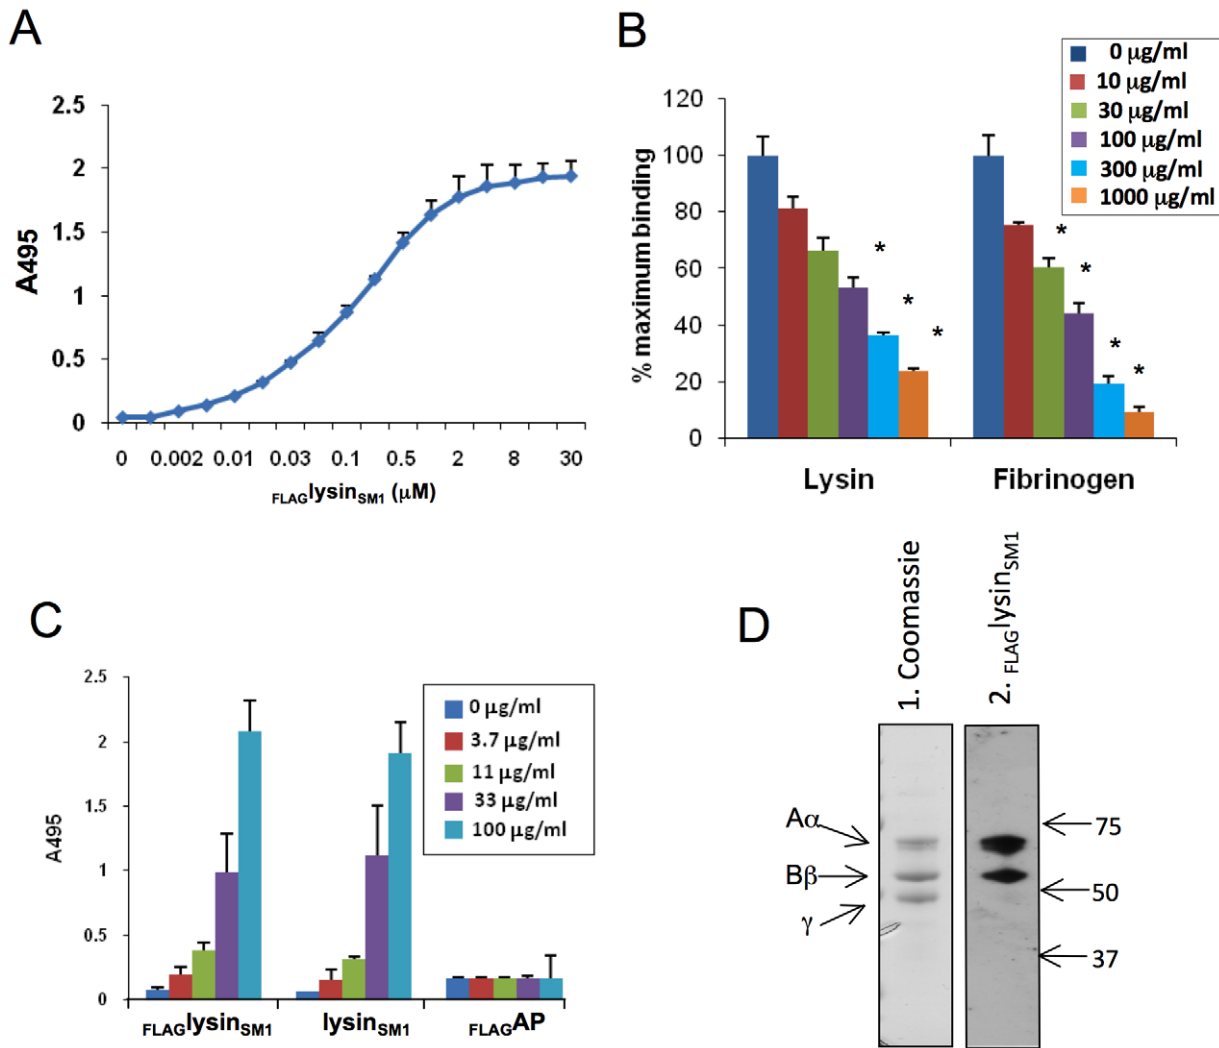

**Figure 4. Lysin-fibrinogen binding.** (A) Binding of FLAGlysin<sub>SM1</sub> to immobilized human fibrinogen. X-axis indicates concentration of FLAGlysin<sub>SM1</sub> incubated with fibrinogen. (B) Inhibition of FLAGlysin<sub>SM1</sub> binding to immobilized fibrinogen by unlabelled lysin<sub>SM1</sub> or fibrinogen. The binding of FLAGlysin<sub>SM1</sub> (3 μg/ml) to immobilized fibrinogen was tested in buffer containing 0 to 1,000 μg/ml of lysin<sub>SM1</sub> or fibrinogen. \* = *P*<0.05, as compared with 0 μg/ml. (C) Fibrinogen binding to immobilized FLAGlysin<sub>SM1</sub>, unlabelled lysin<sub>SM1</sub>, or FLAGAP. Concentrations indicate amount of protein added. Bars are the means (± S.D.) of triplicate results from a representative experiment. (D) Binding of FLAGlysin<sub>SM1</sub> to fibrinogen by far Western blotting. Fibrinogen was separated by SDS-PAGE and stained with Coomassie blue (panel 1) or transferred to nitrocellulose and probed with FLAGlysin<sub>SM1</sub> (panel 2). The three bands detected in panel 1 correspond to Aα, Bβ, γ chains of fibrinogen. Numbers indicate molecular mass. Binding of FLAGlysin<sub>SM1</sub> to the Aα and Bβ chains was readily observed, but not to the γ chain (panel 2). doi:10.1371/journal.ppat.1001047.g004

**Lysin<sub>SM1</sub> binds fibrinogen fragment D but not fragment E**

The fibrinogen molecule is comprised of two subunits, each containing three polypeptide chains (Aα, Bβ, and γ; Fig. 5A). Cleavage of fibrinogen with plasmin produces a series of fragments, most notably the E fragment containing the central part of the molecule, and the D fragment containing the terminal regions. To further identify the domains of fibrinogen bound by lysin<sub>SM1</sub>, we examined the interaction of FLAGlysin<sub>SM1</sub> to the D and E fragments. When assessed by ELISA, FLAGlysin<sub>SM1</sub> showed high levels of binding to immobilized fragment D, which were comparable to those seen with whole fibrinogen (Fig. 5B). In contrast, no significant binding to the E fragment was seen.

Purified fibrinogen fragment D contains three subunits, each representing a part of the three major chains (α chain fragment = 15 kDa, β chain fragment = 44.5 kDa, and γ chain fragment = 42 kDa) (Fig. 5A). To further identify the subdomains

of fibrinogen bound by lysin<sub>SM1</sub>, purified fragment D was separated under reducing conditions and transferred to a nitrocellulose membrane. When assessed by far Western blotting, binding by FLAGlysin<sub>SM1</sub> was limited to the Bβ chain component of fragment D with no binding detected to the Aα chain (Fig. 5C). These data indicate lysin<sub>SM1</sub> binds a region contained within AA 134–461 of the Bβ chain. Of note, lysin<sub>SM1</sub> bound the full-length Aα chain (Fig. 3B), but not its D or E fragments (Fig. 5C), suggesting that the lysin<sub>SM1</sub> binding to the Aα chain requires the C terminus (AA 197–610).

**Lysin<sub>SM1</sub> promotes the interaction of *S. mitis* SF100 with fibrinogen**

To assess the impact of lysin expression on bacterial binding to fibrinogen, we compared the adherence of SF100 (WT) and PS1006 (Δlysin) to fibrinogen immobilized in microtiter wells. As shown in Fig. 6A, SF100 had high levels of binding to immobilized fibrinogen,



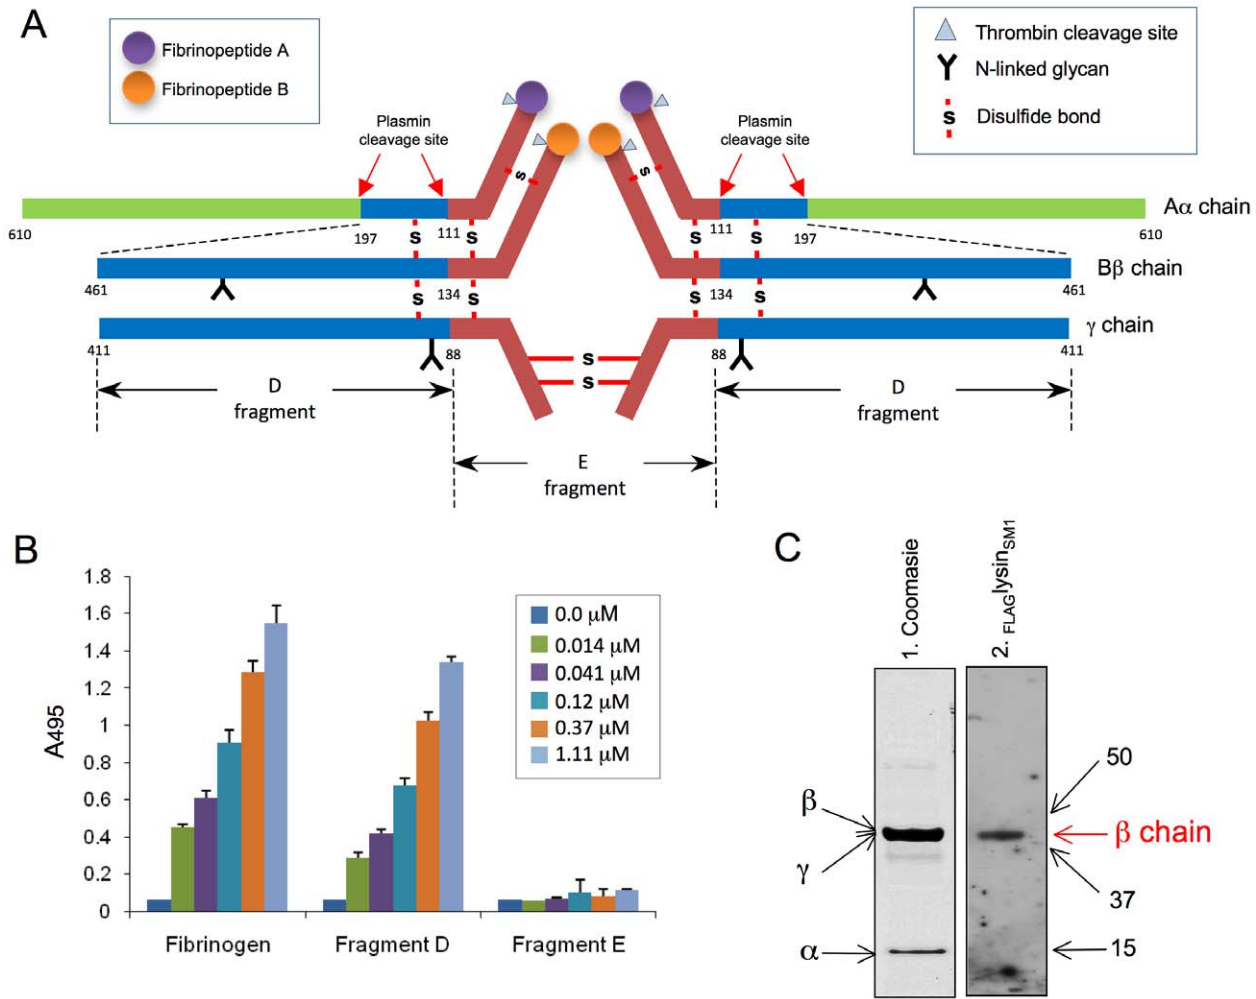

**Figure 5. Binding of FLAGlysin<sub>SM1</sub> to immobilized fibrinogen fragments D and E.** (A) Schematic diagram of human fibrinogen. The  $\alpha$ ,  $\beta$ , and  $\gamma$  chains, major disulfide linkages, and plasmin cleavage sites are shown. (B) Indicated concentrations of FLAGlysin<sub>SM1</sub> were incubated with immobilized human fibrinogen, fibrinogen fragment D, or fragment E. Bound FLAGlysin<sub>SM1</sub> was detected with anti-FLAG antibody. Bars indicate the means ( $\pm$  S.D.). (C) Fibrinogen fragment D was separated by SDS-PAGE under reducing conditions and stained with Coomassie blue (panel 1) or transferred onto nitrocellulose membrane and incubated with FLAGlysin<sub>SM1</sub> (5  $\mu$ g/ml). The bound proteins were detected with anti-FLAG antibody (Lane 2). Arrows indicate positions of  $\alpha$ ,  $\beta$ , and  $\gamma$  chain fragments. Numbers indicate molecular mass (kDa). doi:10.1371/journal.ppat.1001047.g005

which increased in proportion to the amount of fibrinogen in the wells. PS1006 showed markedly reduced levels of binding, as compared with the parent strain. For example, when tested with wells coated with 30  $\mu$ g/ml of fibrinogen, PS1006 had only  $18.8 \pm 4.7\%$  (mean  $\pm$  SD) of maximal binding, as compared with  $89.7 \pm 12.8\%$  for SF100 ( $P < 0.05$ , unpaired t-test). Complementation of the *lysin* mutation *in trans* restored fibrinogen binding by PS1006 (Fig. 6B), thereby demonstrating that the loss of binding observed with *lysin* disruption was not due to polar or pleiotropic effects.

The above results suggested that the binding to immobilized fibrinogen by SF100 is mediated by lysin<sub>SM1</sub> expressed on the bacterial surface. To confirm that lysin was sufficient to mediate fibrinogen binding, we next examined whether exogenous lysin<sub>SM1</sub> could attach to the cell wall of PS1006 and restore binding. The PC-negative strain SK598 served as a negative control. Each strain was incubated with purified FLAGlysin<sub>SM1</sub> at RT for 30 min. After washing to remove nonspecifically bound protein, cell wall bound FLAGlysin<sub>SM1</sub> was extracted with 2% choline, and the amount of FLAGlysin<sub>SM1</sub> recovered was assessed by Western blotting. As shown in Fig. 6C, exogenous FLAGlysin<sub>SM1</sub> could readily be

detected in the cell wall extracts of PS1006, whereas no binding of FLAGlysin<sub>SM1</sub> was observed with SK598.

We then assessed whether this interaction was sufficient to enhance the binding of PS1006 to fibrinogen (Fig. 6D). PS1006 was suspended in PBS containing a range of concentrations of purified lysin<sub>SM1</sub> and then tested for its binding to immobilized fibrinogen, as described above. As expected, PS1006 incubated in PBS alone showed minimal levels of binding to fibrinogen. This was not due to a loss of PblA and PblB expression, since the *pblA/pblB* negative strain PS344 had levels of fibrinogen binding that were similar to those of the parent strain. Exposure of PS1006 to FLAGlysin<sub>SM1</sub> increased fibrinogen binding in a concentration-dependent manner. Indeed, 10  $\mu$ g per ml of FLAGlysin<sub>SM1</sub> was sufficient to restore PS1006 binding to levels comparable to those seen with SF100.

### Role of lysin<sub>SM1</sub> in the pathogenesis of infective endocarditis

To assess the impact of lysin<sub>SM1</sub> on pathogenesis, we compared the relative virulence of SF100, PS344 and PS1006 in a rat co-

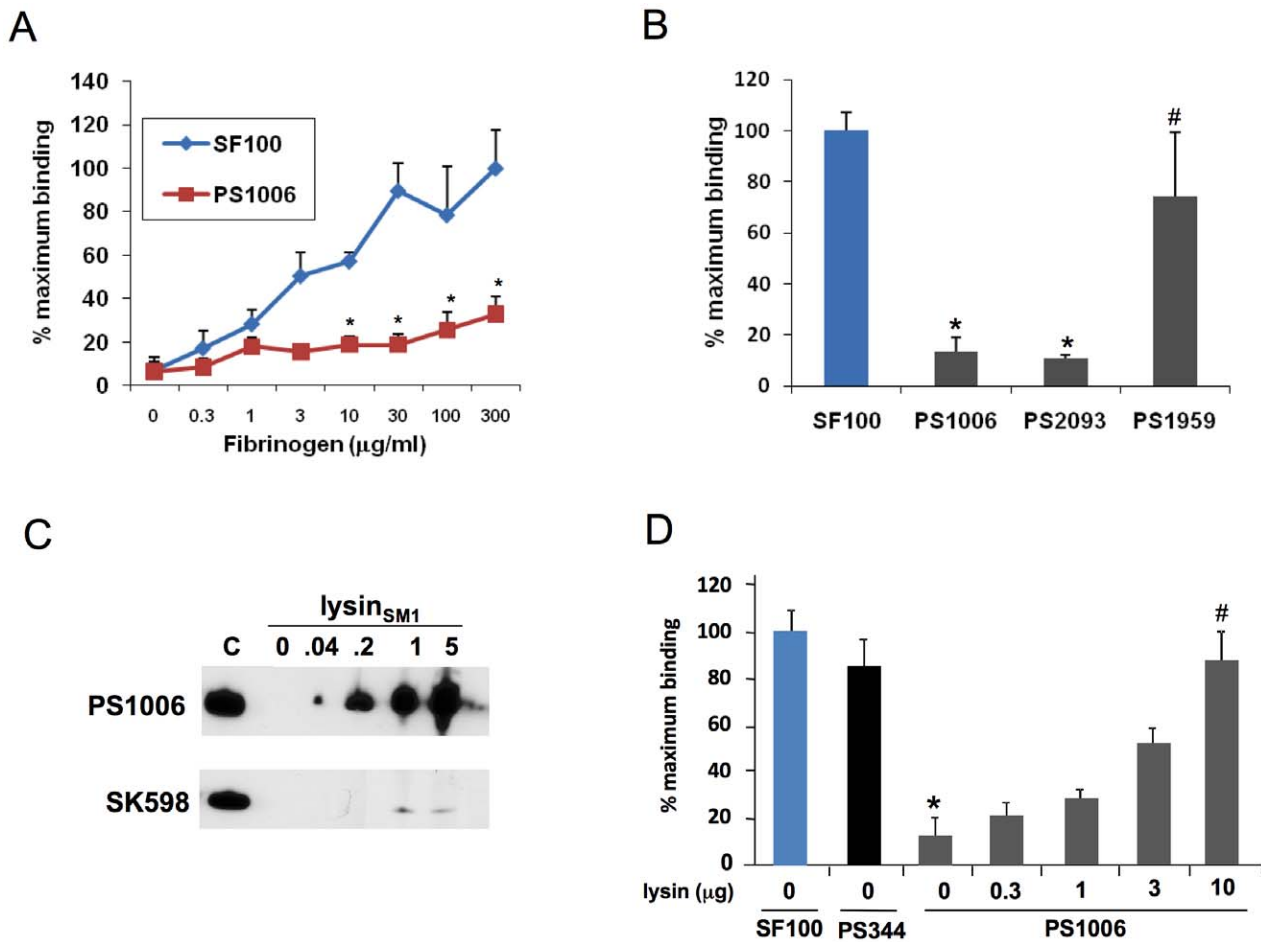

**Figure 6. Lysin mediates binding of bacteria to fibrinogen.** (A)  $10^6$  CFU of SF100 or PS1006 were incubated with wells pretreated with the indicated concentrations of fibrinogen. Values represent percent of SF100 binding to wells treated with 300  $\mu\text{g/ml}$  fibrinogen. (B) Complementation of the *lys* mutant (PS1006) with the *lys* gene *in trans* assessed by measuring *S. mitis* binding to immobilized human fibrinogen. PS1959 (PS1006 complemented with *lys*) demonstrated significantly greater levels of binding ( $P < 0.05$ ) than PS1006 or PS2093 (PS1006 complemented with pDE123 control vector). Levels of fibrinogen binding by PS1959 were comparable to those seen with SF100 ( $P > 0.05$ ). (C) Binding of FLAG-lysin<sub>SM1</sub> to PS1006, but not SK598. Bacteria were incubated with purified lysin<sub>SM1</sub>, and lysin<sub>SM1</sub> bound to the cell wall was detected with anti-FLAG antibody. Lane C contains purified lysin<sub>SM1</sub> (0.2  $\mu\text{g/ml}$ ) as a positive control. (D) PS1006 was incubated with immobilized fibrinogen in the presence of indicated concentration of purified FLAG-lysin<sub>SM1</sub> ( $\mu\text{g/ml}$ ). Values represent percent of SF100 binding, and are the means of triplicate results from a representative experiment. \* =  $P < 0.05$  compared with SF100; # =  $P > 0.05$  compared with PS1006. doi:10.1371/journal.ppat.1001047.g006

infection model of infective endocarditis [16,55]. We first compared SF100 with PS344 to confirm previous results obtained in a rabbit model of infection [16]. As was observed with rabbits, disruption of *pblA* and *pblB* was also associated with attenuated virulence in rats, with PS344 having significantly reduced levels of bacteria within all tissues (Table 1). Disruption of *lysins<sub>SM1</sub>* also produced a significant reduction in virulence. Rats co-infected with SF100 and PS1006 had significantly lower densities of the lysin mutant strain in vegetations (mean  $\pm$  SD =  $5.07 \pm 1.50 \log_{10}$  CFU/g) as compared with the parent strain ( $6.91 \pm 1.35 \log_{10}$  CFU/g;  $n = 8$ ,  $P = 0.009$ ). Densities of PS1006 were also significantly reduced in kidneys ( $P = 0.008$ ) and spleens ( $P < 0.001$ ) as compared with SF100. We then examined the relative impact on virulence of abrogated PblA and PblB expression, versus loss of lysin (Table 1). In animals co-infected with PS344 and PS1006, titers of the latter mutant were significantly reduced in all tissues examined, as compared with the former. In particular, the mean densities of PS1006 within vegetations ( $6.59 \pm 1.45 \log_{10}$  CFU/g) were significantly lower than those of PS344 ( $8.32 \pm 0.76$ ;  $n = 8$ ;

$P = 0.008$ ), as were densities within kidneys ( $P = 0.027$ ) and spleens ( $P = 0.006$ ). We then re-analyzed these data by comparing the ratio of PS344 to PS1006 within tissues, with the CFU of each strain normalized to the number of CFU within the inoculum (competition index) (Figure S4). When assessed by this approach, the levels of the lysins<sub>SM1</sub> mutant PS1006 remained significantly reduced in all tissues, as compared with PS344. Thus, lysins<sub>SM1</sub> appears to be a significant virulence determinant in the setting of infective endocarditis. Moreover, its role in pathogenesis is not due solely to any effect it may have on PblA and PblB expression. Instead, it appears to have an impact upon the development of infective endocarditis independent of these other phage-encoded proteins.

## Discussion

The binding of pathogenic bacteria to platelets is thought to play a key role in the pathogenesis of infective endocarditis. This interaction may be important both for the initial attachment of

**Table 1.** Impact of lysin expression on virulence in a rat model of infective endocarditis.

| Strain pairs                  | N  | Vegetations                               |        | Kidneys                                   |       | Spleens                                   |        |
|-------------------------------|----|-------------------------------------------|--------|-------------------------------------------|-------|-------------------------------------------|--------|
|                               |    | Mean $\pm$ S.D. (Log <sub>10</sub> CFU/g) | P      | Mean $\pm$ S.D. (Log <sub>10</sub> CFU/g) | P     | Mean $\pm$ S.D. (Log <sub>10</sub> CFU/g) | P      |
| <b>SF100</b><br><b>PS344</b>  | 8  | 6.19 $\pm$ 0.84<br>5.39 $\pm$ 1.09        | <0.001 | 3.10 $\pm$ 0.91<br>2.28 $\pm$ 0.94        | 0.018 | 3.20 $\pm$ 0.56<br>2.23 $\pm$ 0.91        | 0.005  |
| <b>SF100</b><br><b>PS1006</b> | 12 | 6.91 $\pm$ 1.35<br>5.07 $\pm$ 1.50        | 0.009  | 3.62 $\pm$ 1.33<br>2.40 $\pm$ 1.35        | 0.008 | 3.58 $\pm$ 1.17<br>2.50 $\pm$ 1.41        | <0.001 |
| <b>PS344</b><br><b>PS1006</b> | 8  | 8.32 $\pm$ 0.76<br>6.59 $\pm$ 1.45        | 0.008  | 3.89 $\pm$ 0.77<br>2.94 $\pm$ 1.22        | 0.027 | 3.34 $\pm$ 0.74<br>2.25 $\pm$ 1.32        | 0.006  |

Bacterial densities within tissues 72 h after co-infection.  
doi:10.1371/journal.ppat.1001047.t001

bacteria to the endocardial surface, and for the subsequent formation of vegetations. Numerous endocarditis-associated pathogens have been shown to bind platelets directly *in vitro*, through a variety of mechanisms [3,4,7,8,25,30]. The ability to bind platelets *in vitro* has been linked to virulence for several of the most common endocarditis-associated species, including *Staphylococcus aureus*, *Streptococcus gordonii*, and *Streptococcus sanguinis* [5,31,32,33]. Previous work from our laboratory has shown that platelet binding by *S. mitis* strain SF100 is mediated in part by two proteins (PblA and PblB) encoded by the lysogenic bacteriophage SM1 [16]. The functional localization of these proteins to the cell surface requires the phage lysin (lysin<sub>SM1</sub>), which permeabilizes the host organism, thereby permitting the transport of PblA and PblB from the cytoplasm to the bacterial surface, and their subsequent attachment to the cell wall [16]. During the course of these studies, we noted that disruption of the gene encoding lysin<sub>SM1</sub> reduced platelet binding *in vitro* more profoundly than the loss of PblA and PblB localization, indicating that lysin had a role in platelet binding beyond facilitating PblA and PblB transport. It was unknown, however, whether lysin itself could directly mediate binding, or rather, the effects of lysin on bacterial permeability led to the surface expression of other proteins (either phage or bacterial) that could enhance platelet binding.

Our current results demonstrate that lysin can bind human platelets directly through its interaction with fibrinogen. Purified lysin was found to bind fibrinogen, regardless of whether the proteins were in solution or immobilized. The binding of lysin with fibrinogen also was saturable, consistent with a receptor-ligand interaction. Lysin binding was restricted to the D fragment of the A $\alpha$  and A $\beta$  chains, further indicating that this is a specific process. This interaction appears to be important for the binding of *S. mitis* to fibrinogen, since disruption of the gene encoding lysin markedly reduced fibrinogen binding by bacteria *in vitro*. The addition of exogenous purified lysin to these mutants restored binding to WT levels, confirming that lysin can directly mediate the interaction of *S. mitis* with fibrinogen.

A number of other bacterial proteins have been shown to bind fibrinogen, including the M protein and serum opacity factor of *Streptococcus pyogenes*, FbsA of *Streptococcus agalactiae*, SdrG of *Staphylococcus epidermidis*, and several proteins of *Staphylococcus aureus* (clumping factors A and B, fibronectin binding protein A) [4,22,25,30,34]. However, none of these proteins exhibit any primary sequence homology with lysin<sub>SM1</sub>. The staphylococcal autolysins Aaa and Aae do resemble lysin<sub>SM1</sub>, in that they appear to have both enzymatic and fibrinogen binding activities *in vitro* [35,36]. A search against the SMART and Pfam databases indicates that collectively

these proteins belong to the NlpC/P60 superfamily of proteins, containing their catalytic domain that are characteristic of this group of proteins. However, the predicted catalytic activity of lysin<sub>SM1</sub> (amidase 5) is different from that autolysins Aaa and Aae. Lysin<sub>SM1</sub> has no sequence similarity to either the Aaa or Aae protein, and unlike these other proteins, it is a choline-binding protein. Thus, lysin appears to be a multi-functional protein that can mediate *S. mitis* binding to fibrinogen, in addition to its role in the transit of the PblA and PblB proteins to the cell surface.

Lysin<sub>SM1</sub> was also associated with increased virulence in a rat model of infective endocarditis. When animals were co-infected with the parent strain SF100 and the lysin<sub>SM1</sub> mutant PS1006, densities of the lysin mutant were significantly reduced within vegetations, kidneys, and spleens, as compared with the parent strain. Moreover, the virulence of PS1006 was also attenuated, when compared with its *pblA* and *pblB*-deficient isogenic variant, PS344. These results indicate that, beyond its importance for PblA and PblB expression, lysin contributes to virulence through a mechanism beyond its role in the transport of these bacteriophage-encoded adhesins. It is possible that there are other, unrecognized phage-encoded virulence factors that require lysin for export or localization. However, in view of the ability of lysin to bind fibrinogen directly (both human and rat), and that fibrinogen binding has been associated with virulence for several other adhesins [37,38,39,40,41], it is likely that this interaction of lysin with fibrinogen contributes to the pathogenesis of infective endocarditis by *S. mitis*. Given that lysin-fibrinogen binding enhances bacterial adherence to platelets *in vitro*, and that bacterium-platelet binding has been linked to virulence, it is likely that lysin-mediated binding to platelets via fibrinogen is an important pathogenetic interaction. However, it is also possible that lysin mediates streptococcal binding to fibrinogen on other surfaces, such as damaged endothelium. Finally, it is conceivable that lysin contributes to virulence through other, as yet unidentified interactions.

In summary, lysin is a novel fibrinogen-binding protein encoded by a lysogenic bacteriophage of *S. mitis*. In addition to its expected role in cell wall degradation, lysin also appears to be an adhesin mediating the attachment of this organism to human platelets, through its interaction with cell wall PC, fibrinogen, and the platelet membrane receptor for fibrinogen, glycoprotein IIb/IIIa (Fig. 7). Lysin also appears to contribute significantly to virulence, which could explain the persistence of certain bacteriophages within their host organisms. Although induction of the phage lytic cycle extracts a toll on host viability, *in vivo* this may be more than offset by the enhanced virulence resulting from



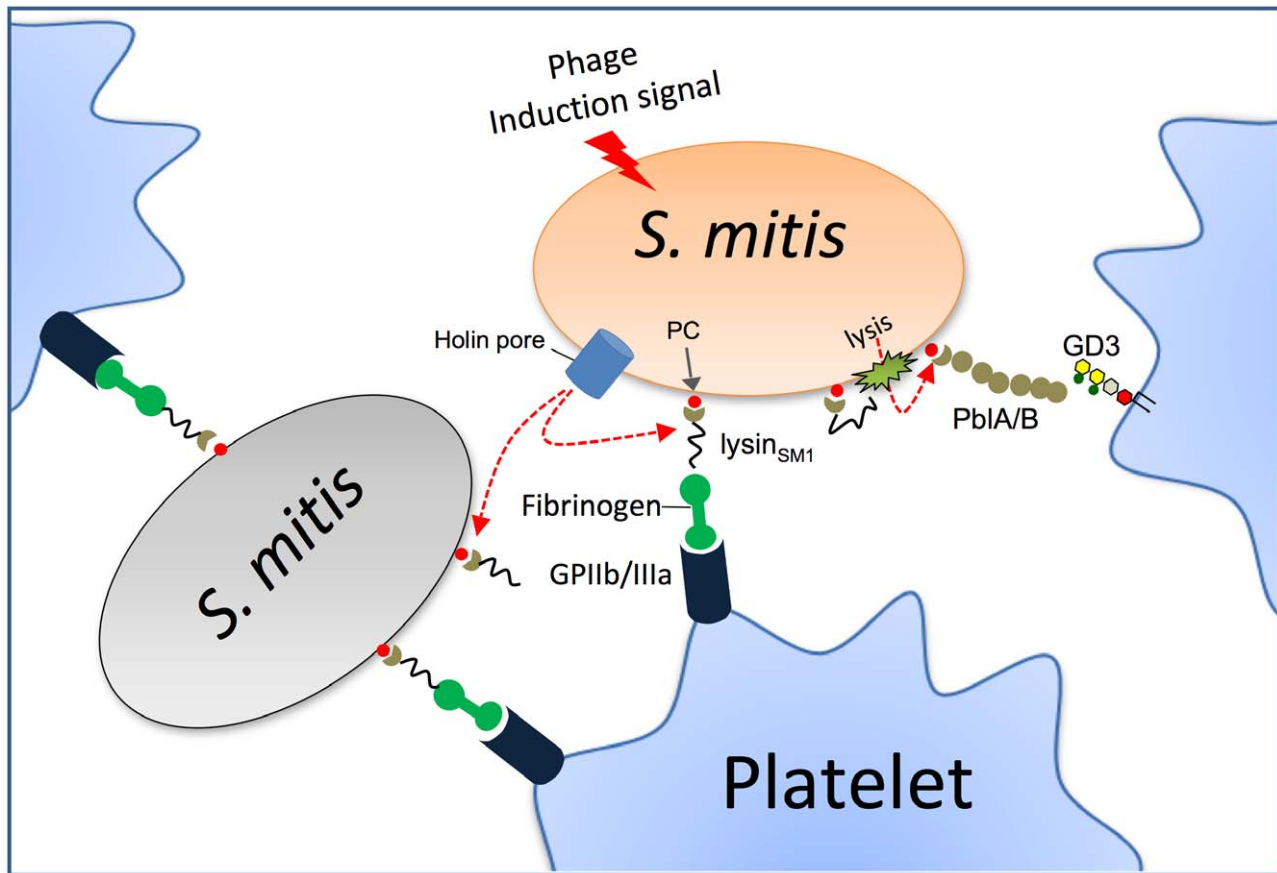

**Figure 7. Model for the role of lysin in platelet binding.** Phage lysin is exported through the holin pore and mounted on the bacterial surface of the same or adjacent organisms through its interaction with PC residues. Lysin can then mediate platelet binding via its interaction with fibrinogen and glycoprotein IIb/IIIa (GPIIb/IIIa), which is the principal fibrinogen receptor on platelets. Through its amidase activity, lysin can also permeabilize the cell wall, permitting the release and surface expression PblA and PblB. These phage proteins also interact with platelets by binding the membrane ganglioside GD3.

doi:10.1371/journal.ppat.1001047.g007

lysine expression. Since fibrinogen is also present within gingival crevicular fluid, lysin-fibrinogen binding may also contribute to the colonization of oral surfaces by *S. mitis* [42,43]. Although we do not know the exact prevalence of lysin<sub>SM1</sub> homologs in other organisms, recent studies of *S. pneumoniae* and *Enterococcus faecalis* indicate that lysogenic bacteriophages encoding homologs of PblA and PblB are often present within these species [44,45]. Since lysins are required for the phage life cycle, these findings suggest that homologs of lysin<sub>SM1</sub> may also be encoded by such prophages. If so, then lysin binding to fibrinogen could prove to be an important interaction for a range of Gram-positive pathogens.

## Materials and Methods

### Ethics statement

Blood was obtained from healthy human volunteers, using a protocol approved by the Committee on Human Research at the University of California, San Francisco. All human studies were conducted according to the principles expressed in the Declaration of Helsinki. Written informed consent was obtained from all study participants prior to their participation. All procedures involving rats were approved by the Los Angeles Biomedical Research Institute animal use and care committee, following the National Institutes of Health guidelines for animal housing and care.

### Reagents

N terminal Met-FLAG-alkaline phosphatase (FLAG-AP) and purified rat fibrinogen were purchased from Sigma-Aldrich. Purified human fibrinogen and the fibrinogen fragment D and E (produced by cleavage of fibrinogen with plasmin) were obtained from Haematologic Technologies. Rabbit anti-human fibrinogen polyclonal IgG was purchased from Innovative Research.

### Cloning and expression of lysin<sub>SM1</sub>

Genomic DNA was isolated from SF100, using Wizard Genomic DNA purification kits (Promega), according to the manufacturer's instructions. Polymerase chain reaction (PCR) was performed with the primers listed in Table S2. To clone *lys* gene into *E. coli* expression vector, PCR products were purified, digested, and ligated into pET28<sub>FLAG</sub> to express FLAG-tagged versions of full length lysin<sub>SM1</sub> (amino acids [AA] 1–295), the amino terminus of lysin<sub>SM1</sub> (AA 1–158; N-lysin<sub>SM1</sub>), or the carboxy terminus of lysin<sub>SM1</sub> (AA 141–295; C-lysin<sub>SM1</sub>). Untagged lysin<sub>SM1</sub>, C-lysin<sub>SM1</sub>, and His-tagged N-lysin<sub>SM1</sub> (His<sub>6</sub>-N-lysin<sub>SM1</sub>) were cloned into pET22b(+) (Novagen). The plasmids were then introduced to *E. coli* BL21(DE3) by transformation. Lysin<sub>SM1</sub>, FLAG-lysin<sub>SM1</sub>, C-lysin<sub>SM1</sub> and FLAG-C-lysin<sub>SM1</sub> were purified with DEAE-cellulose columns, as described previously [16]. FLAG-N-lysin<sub>SM1</sub> and His<sub>6</sub>-N-lysin<sub>SM1</sub> were purified by either Ni-NTA (Promega) or anti-FLAG M2 agarose affinity chroma-

tography (Sigma-Aldrich), according to the manufacturers' instructions.

### Deletion or complementation of the *lys* gene (*lys*)

A gene replacement cassette was constructed by cloning the chromosomal regions flanking *lys* upstream and downstream of the *cat* gene in pC326 [16]. A 339 bp upstream segment was amplified using primers KO4F and KO4R, and then digested with *Xho*I and *Hind*III. A 513 bp downstream segment was amplified with primers KO6F and KO6R, and then digested with *Eco*RI. The upstream and downstream fragments were cloned sequentially into the corresponding sites of pC326. The resulting plasmid, pKO-*lys*, was introduced into SF100 by natural transformation as previously described [17]. In brief, overnight SF100 cultures were diluted 100-fold in fresh THB supplemented with 20% heat-inactivated horse serum, 200 ng/ml competence-stimulating peptide (CSP; DWRISETIRNLIFPRRK), and 1 µg/ml of plasmid. Transformation mixtures were incubated 4 h at 37°C and then plated on blood agar containing 5 µg chloramphenicol per ml. To complement *in trans* the *lys* mutation in PS1006, *lys* was amplified using primers 3206-*Xba*I and 5206-*Eco*RI and then cloned into the streptococcal expression vector pDE123. This plasmid was derived from pDC123 by replacing the chloramphenicol resistance marker with an erythromycin resistance marker [46]. The resulting plasmid, pDE-*lys*, was introduced into PS1006 by natural transformation.

### Strains and growth conditions

The bacteria and plasmids used in this study are listed in Table S1. *S. mitis* strains were grown in Todd-Hewitt broth (Difco) supplemented with 0.5% yeast extract (THY). PS344 ( $\Delta$ ORF47-PblB::pVA891) and PS1006 ( $\Delta$ *lys*<sub>SM1</sub>) are isogenic variants of *S. mitis* SF100, which is an endocarditis-associated clinical isolate [16]. All three strains grow comparably well *in vitro*. *S. pneumoniae* strains were grown in either a chemically defined medium (CDM; JRH bioscience) [47] supplemented with 0.1% choline chloride, or THY. *S. pneumoniae* HS0001 is a nonencapsulated pneumococcal strain derived from the TIGR4 strain by deleting the capsule synthesis locus as described previously [48]. *S. pneumoniae* HS0001-EA is a PC-negative strain derived from HS0001 as described previously [49]. *Escherichia coli* DH5 $\alpha$  and BL21(DE3) strains were grown at 37°C under aeration in Luria broth (LB; Difco). Appropriate concentrations of antibiotics were added to the media, if required.

### Purification of *lys*<sub>SM1</sub> and C-*lys*<sub>SM1</sub> in DEAE-cellulose

Transformed *E. coli* BL21(DE3) cells were harvested by centrifugation, washed and suspended in 50 mM Tris-maleate (TM) buffer (Sigma-Aldrich), pH 6.3. Cells were disrupted by treatment with B-PER lysis solution (Pierce, Rockford, IL) and the debris was removed by centrifugation at 4,000 rpm for 10 min at 4°C. Supernatants were loaded on a 2 ml DEAE-cellulose (Sigma-Aldrich) column equilibrated with 50 mM TM buffer, pH 6.3. The column was washed with at least 3 volumes of 50 mM TM buffer, pH 6.3, containing 1.5 M NaCl and 0.1% choline chloride, until no protein was detected in the eluent. The retained proteins were then eluted with 50 mM TM buffer, pH 6.3, containing 1.5 M NaCl and 2% choline chloride. Recombinant protein was dialyzed against PBS and then stored at -70°C.

### Bactericidal assay

Early log phase ( $A_{600}$  = 0.5) bacteria were harvested by centrifugation and suspended in PBS at approximately 10<sup>8</sup>-

10<sup>9</sup> CFU/ml. Bacteria samples were then incubated with or without 30 µg/ml of purified *lys*<sub>SM1</sub> at 37°C for 30 min. Samples were serially diluted in PBS and plated onto blood agar, to determine the number of surviving bacteria.

### Isolation of platelet membranes

Platelet membranes were prepared by glycerol lysis and gradient centrifugation, as previously described [50]. In brief, isolated human platelets were lysed in 5 volumes of lysis buffer (8.5 mM Tris-Cl, 96.5 mM NaCl, 85.7 mM glucose, 1 mM EDTA, 10 mM EGTA [pH 7.4]) containing Complete Protease Inhibitor Cocktail (Roche). The sample was centrifuged (5,900 × *g*, 10 min) to remove unlysed platelets, and the supernatant was applied to a sucrose step gradient (10 ml of 33% sucrose on 5 ml of 66% sucrose in buffer). After ultracentrifugation (90 min, 63,000 × *g*, 4°C), the membranes were removed, dialyzed against PBS containing 10% glycerol, and stored at -70°C.

### Far western blot analysis

Samples were separated by electrophoresis through 4–12% NuPAGE Bis-Tris gels (Invitrogen) and transferred onto nitrocellulose membranes. The membrane were treated with a casein-based blocking solution (Western Blocking Reagent; Roche) at room temperature, and then incubated for 1 h with *FLAG**lys*<sub>SM1</sub> (5 µg/ml) or purified human fibrinogen (1 µg/ml) suspended in PBS-0.05% Tween 20 (PBS-T). The membranes were then washed three times for 15 min in PBS-T, and bound probe proteins were detected with mouse anti-FLAG monoclonal antibody (Sigma-Aldrich) or rabbit anti-fibrinogen polyclonal IgG antibody.

### Lysin binding to platelet monolayers or platelet membranes

Washed, fixed human platelets or purified platelet membranes were immobilized in 96 well microtiter plates as described previously [51]. To reduce non-specific adherence, the wells were then treated with the casein-based blocking reagent for 1 h at room temperature. The blocking solution was removed by aspiration, and the wells were incubated with 0 to 100 µg of *FLAG**lys*<sub>SM1</sub> in PBS for 1 h, at RT, followed by washing to remove unbound protein. Bound *FLAG**lys*<sub>SM1</sub> was detected by ELISA with anti-FLAG antibody. For some studies, the wells containing platelet membranes were pretreated with 0 to 100 µg/ml of rabbit anti-fibrinogen antibody for 30 min, followed by washing to remove unbound antibody. Binding by *FLAG**lys*<sub>SM1</sub> (5 µg/ml) was then assessed as described above.

### Binding of recombinant *FLAG**lys*<sub>SM1</sub> to fibrinogen and fibrinogen fragments

Rat fibrinogen (10 µg/ml), human fibrinogen, or human fibrinogen D or E fragments (all 15 nM in PBS), were immobilized in 96-well microtiter dishes by overnight incubation at 4°C. The wells were washed twice with PBS and blocked with 300 µl of casein-based blocking solution for 1 h at room temperature. The plates were washed three times with PBS, and a range of *FLAG**lys*<sub>SM1</sub> concentrations in PBS with Tween 20 (0.05%) were added. The plates were then incubated for 2 h at 37°C. Unbound protein was removed by washing with PBS, and plates were incubated with mouse anti-FLAG antibodies for 1 h at 37°C. Binding was assessed by ELISA, using HRP-conjugated rabbit anti-mouse IgG, for 1 h at 37°C. *FLAG*AP (25–100 µg/ml) served as a control for nonspecific binding.

To examine the binding of fibrinogen to immobilized FLAG-lysins<sub>SM1</sub>, untagged lysins<sub>SM1</sub>, or FLAG-AP (10 µg/ml in PBS) were immobilized in 96 well microtiter plates, followed by blocking of the wells with the casein blocking solution. The wells were incubated with a range of human fibrinogen for 1 h at room temperature, followed by washing. Bound fibrinogen was detected by ELISA, using anti-human fibrinogen IgG.

#### Assay for lysins<sub>SM1</sub> binding to bacterial cell walls

Cultures of PS1006 and *S. mitis* SK598 in the early log phase of growth ( $A_{600} = 0.5$ ) were harvested by centrifugation and suspended in PBS. The bacteria were incubated with purified FLAG-lysins<sub>SM1</sub> (0 to 10 µg/ml) for 30 min at room temperature. The samples were washed twice with PBS to remove unbound FLAG-lysins<sub>SM1</sub> and incubated with PBS-2% choline chloride to elute choline-binding proteins from the cell walls, as described previously [21]. Eluted cell wall proteins were harvested by centrifugation and loaded onto SDS-PAGE. Cell wall bound FLAG-lysins<sub>SM1</sub> was detected by western blotting with anti-FLAG antibody.

#### Assay for the binding of SF100 to immobilized fibrinogen

Overnight cultures of *S. mitis* SF100 or its isogenic mutants (PS1006 and PS344) were diluted 1:10 in fresh THY broth, incubated for 1 h at 37°C, and then exposed to UV light ( $\lambda = 312$  nm) for 3 min, to induce the expression of the lysogenic bacteriophage SM1. The cultures were then incubated at 37°C for an additional 2 h, followed by harvesting by centrifugation. The pellets were suspended in PBS, and adjusted to a concentration of  $10^6$  CFU/ml. One hundred microliters of each suspension were added to wells that had been coated overnight with 30 µg/well of fibrinogen in carbonate buffer. The plates were incubated at room temperature for 1 h, and the wells were washed three times with PBS to remove nonadherent bacteria. The wells were then treated with 50 µl of trypsin (2.5 mg/ml) for 30 min at 37°C to release the bound bacteria. The number of bound bacteria was determined by plating serial dilutions of the recovered bacteria onto blood agar.

#### Lipoteichoic acid (LTA) purification

LTA was prepared from *S. pneumoniae* HS0001 and *S. mitis* strains by organic solvent extraction and octyl-Sepharose chromatography, as previously described [52]. In brief, bacteria were cultured at 37°C for 10 h in CDM with 0.1% choline chloride (Fisher scientific Inc.). To purify PC negative LTA, *S. pneumoniae* HS0001-EA was cultured for 16 h in CDM supplemented with 2% ethanolamine. Pelleted bacteria were suspended in 0.05 M sodium acetate (pH 4.0) and lysed by sonication. After extraction from the lysate with a chloroform and methanol mixture (1:0.9), the LTA was adsorbed onto an octyl-Sepharose CL-4B (Sigma-Aldrich) equilibrated in a mixture of 15% n-propanol and 0.05 M sodium acetate (pH 4.7). The adsorbed LTA was then eluted with 35% n-propanol in 0.05 M sodium acetate (pH 4.7).

#### Analysis of LTA structure

Purified LTA was analyzed by matrix-assisted laser desorption ionization-time of flight (MALDI-TOF) mass spectrometry [52] (Figure S5). In brief, 1 µl of a sample (1 µg/ml) and 1 µl of matrix solution (0.5 M 2, 5-dihydroxybenzoic acid and 0.1% trifluoroacetic acid in methanol) were applied to a sample plate. After drying, the sample was analyzed with a mass spectrometer (Voyager Biospectrometry DE Pro workstation; PerSeptive Biosystems). Purified LTA showed three major peaks that corresponded to LTA with five, six, and seven repeating units,

respectively. The mass difference between the major peaks was 1299 or 1100 amu, corresponding to an oligosaccharide repeating unit with two PC groups or two phosphoethanolamine groups [52]. In addition, PC expression by strains HS0001 and SF100 was directly assessed by western blotting with anti-PC antibody (TEPC-15; Sigma-Aldrich) [53] (Figure S6).

#### Rat model of infective endocarditis

The relative virulence of SF100 and its isogenic variants was compared in a competition model of infective endocarditis, as described previously [16,54]. In brief, Sprague-Dawley female rats (250 to 300 g each) were first anesthetized with ketamine (35 mg/kg) and xylazine (10 mg/kg). A sterile polyethylene catheter was surgically placed across the aortic valve of each animal, such that the tip was positioned in the left ventricle, to induce the formation of sterile vegetations (nonbacterial thrombotic endocarditis). The catheters were left in place throughout the study. Seven days post-catheterization, the animals were infected intravenously with an inoculum of  $10^5$  CFU containing a 1:1 mixture of a) SF100 and PS344, b) SF100 and PS1006, or c) PS344 and PS1006. At 72 hr post-infection, the rats were euthanized with thiopental (100 mg IP). Animals were included in the final analysis only if the catheters were correctly positioned across the aortic valve at the time of sacrifice, and if macroscopic vegetations were visible. All cardiac vegetations, as well as samples of the kidneys and spleens, were harvested, weighed, homogenized in saline, serially diluted, and plated onto 8% Todd Hewitt agar ( $\pm 2.5$  µg/ml of chloramphenicol or 5 µg/ml of erythromycin) for quantitative culture. The plates were cultured for 48 h at 37°C, and bacterial densities were expressed as the log<sub>10</sub> CFU per gram of tissue. Differences in means were compared for statistical significance by the paired t-test. The data were also analyzed by calculating a “competition index,” which was defined as the ratio of the paired strains within tissues for each animal, normalized by the ratio of organisms in the inoculum. The mean of the log<sub>10</sub> normalized ratios was tested against the hypothesized ‘no effect’ mean value of 0, as described previously, using a paired t-test, with  $P < 0.05$  as the threshold for statistical significance [55].

#### Data analysis

Data expressed as means  $\pm$  standard deviations were compared for statistical significance by the paired or unpaired *t* test, as indicated.

#### Supporting Information

**Figure S1** Binding of FLAG-N-lysins<sub>SM1</sub> or FLAG-C-lysins<sub>SM1</sub> to immobilized LTA. A. Binding of FLAG-N-lysins<sub>SM1</sub> or FLAG-C-lysins<sub>SM1</sub> to immobilized LTA from *Streptococcus mitis* SF100 (10 µg/ml). B. Binding of FLAG-C-lysins<sub>SM1</sub> to immobilized LTA from *Streptococcus pneumoniae* HS0001 (SpLTA-PC), which contains PC, or LTA from *Streptococcus pneumoniae* HS0001-EA (SpLTA-EA), which lacks PC. Bars indicate the means ( $\pm$  S.D.) of triplicate results in a representative experiment.  
Found at: doi:10.1371/journal.ppat.1001047.s001 (0.22 MB TIF)

**Figure S2** Binding of FLAG-lysins<sub>SM1</sub> or FLAG-tagged alkaline phosphatase (FLAG-AP) to immobilized fibrinogen. Indicated concentrations of FLAG-lysins<sub>SM1</sub> or FLAG-AP were incubated with fibrinogen immobilized in microtiter wells, as described in the [Methods] section. Bars indicate means  $\pm$  S.D.  
Found at: doi:10.1371/journal.ppat.1001047.s002 (0.14 MB TIF).

**Figure S3** Binding of FLAG-lysins<sub>SM1</sub> to immobilized rat fibrinogen. Microtiter wells were coated with rat fibrinogen (10 µg/ml),

washed, and then incubated with the indicated concentrations of FLAG-lysins<sub>SM1</sub>. Binding was assessed as described for human fibrinogen in the [Methods] section. Values shown are the means ( $\pm$  S.D.) of triplicate data from a representative experiment. Found at: doi:10.1371/journal.ppat.1001047.s003 (0.13 MB TIF)

**Figure S4** Impact of lysins<sub>SM1</sub> expression on virulence. Endocarditis was produced in rats, using an inoculum containing SF100 and PS344, SF100 and PS1006, or PS344 and PS1006 at a 1:1 ratio. 72 h post infection, the animals were sacrificed, and log<sub>10</sub> CFU/g of tissue (vegetation, kidney, and spleen) for each strain was determined by plating onto selective media. *In vivo* competition index (CI) was calculated for each pair of organisms as described in the [Methods]. Circles represent data from individual animals. A CI below 10<sup>0</sup> indicates a competitive disadvantage for A) PS344 versus PS344, B) PS1006 versus SF100, or C) PS1006 versus PS344. Found at: doi:10.1371/journal.ppat.1001047.s004 (0.20 MB TIF)

**Figure S5** Structural analysis of lipoteichoic acid by MALDI-TOF mass spectrometry. A. Biochemical structure of *S. mitis* and *S. pneumoniae* LTA. B. Mass spectra of *S. pneumoniae* HS0001 LTA. Peaks at *m/z* 8572, 9872, and 11171 indicate LTA molecules with 6, 7, and 8 repeating units. C. Mass spectra of *S. mitis* SF100 LTA. Peaks at *m/z* 7273, 8573, and 9872 indicate LTA molecules with 6, 7, and 8 repeating units. Due to composition of lipid tails, each peak has at least three satellite peaks that differ from the major peak by 26–28 AMU.

## References

- Knox KW, Hunter N (1991) The role of oral bacteria in the pathogenesis of infective endocarditis. *Aust Dent J* 36: 286–292.
- Bashore TM, Cabell C, Fowler V, Jr. (2006) Update on infective endocarditis. *Curr Probl Cardiol* 31: 274–352.
- Ganesh VK, Rivera JJ, Smeds E, Ko YP, Bowden MG, et al. (2008) A structural model of the *Staphylococcus aureus* ClfA-fibrinogen interaction opens new avenues for the design of anti-staphylococcal therapeutics. *PLoS Pathog* 4: e1000226.
- McDevitt D, Nanavaty T, House-Pompeo K, Bell E, Turner N, et al. (1997) Characterization of the interaction between the *Staphylococcus aureus* clumping factor (ClfA) and fibrinogen. *Eur J Biochem* 247: 416–424.
- Miajlovic H, Loughman A, Brennan M, Cox D, Foster TJ (2007) Both complement- and fibrinogen-dependent mechanisms contribute to platelet aggregation mediated by *Staphylococcus aureus* clumping factor B. *Infect Immun* 75: 3335–3343.
- Fitzgerald JR, Foster TJ, Cox D (2006) The interaction of bacterial pathogens with platelets. *Nat Rev Microbiol* 4: 445–457.
- Loughman A, Fitzgerald JR, Brennan MP, Higgins J, Downer R, et al. (2005) Roles for fibrinogen, immunoglobulin and complement in platelet activation promoted by *Staphylococcus aureus* clumping factor A. *Mol Microbiol* 57: 804–818.
- O'Brien L, Kerrigan SW, Kaw G, Hogan M, Penades J, et al. (2002) Multiple mechanisms for the activation of human platelet aggregation by *Staphylococcus aureus*: roles for the clumping factors ClfA and ClfB, the serine-aspartate repeat protein SdrE and protein A. *Mol Microbiol* 44: 1033–1044.
- Ford I, Douglas CW (1997) The role of platelets in infective endocarditis. *Platelets* 8: 285–294.
- Bek-Thomsen M, Tettelin H, Hance I, Nelson KE, Kilian M (2008) Population diversity and dynamics of *Streptococcus mitis*, *Streptococcus oralis*, and *Streptococcus infantis* in the upper respiratory tracts of adults, determined by a nonculture strategy. *Infect Immun* 76: 1889–1896.
- Ng KH, Lee S, Yip SF, Que TL (2005) A case of *Streptococcus mitis* endocarditis successfully treated by linezolid. *Hong Kong Med J* 11: 411–413.
- Huang IF, Chiou CC, Liu YC, Hsieh KS (2002) Endocarditis caused by penicillin-resistant *Streptococcus mitis* in a 12-year-old boy. *J Microbiol Immunol Infect* 35: 129–132.
- Hall GE, Baddour LM (2002) Apparent failure of endocarditis prophylaxis caused by penicillin-resistant *Streptococcus mitis*. *Am J Med Sci* 324: 51–53.
- Chayakul P, Hortiwakul R, Yipintsoi T, Ingviya N (2002) Varidans streptococci in the oral flora of the patients at risk for infective endocarditis: species and penicillin susceptibilities. *J Med Assoc Thai* 85: 825–830.
- Mitchell J, Sullam PM (2009) *Streptococcus mitis* phage-encoded adhesins mediate attachment to {alpha}2-3-linked sialic acid residues on platelet membrane gangliosides. *Infect Immun* 77: 3485–3490.
- Mitchell J, Siboo IR, Takamatsu D, Chambers HF, Sullam PM (2007) Mechanism of cell surface expression of the *Streptococcus mitis* platelet binding proteins PblA and PblB. *Mol Microbiol* 64: 844–857.
- Bensing BA, Siboo IR, Sullam PM (2001) Proteins PblA and PblB of *Streptococcus mitis*, which promote binding to human platelets, are encoded within a lysogenic bacteriophage. *Infect Immun* 69: 6186–6192.
- Marchler-Bauer A, Panchenko AR, Shoemaker BA, Thiessen PA, Geer LY, et al. (2002) CDD: a database of conserved domain alignments with links to domain three-dimensional structure. *Nucleic Acids Res* 30: 281–283.
- Sheehan MM, Garcia JL, Lopez R, Garcia P (1997) The lytic enzyme of the pneumococcal phage Dp-1: a chimeric lysin of intergeneric origin. *Mol Microbiol* 25: 717–725.
- Pritchard DG, Dong S, Kirk MC, Cartee RT, Baker JR (2007) LambdaSa1 and LambdaSa2 prophage lysins of *Streptococcus agalactiae*. *Appl Environ Microbiol* 73: 7150–7154.
- Caubin J, Martin H, Roa A, Cosano I, Pozuelo M, et al. (2001) Choline-binding domain as a novel affinity tag for purification of fusion proteins produced in *Pichia pastoris*. *Biotechnol Bioeng* 74: 164–171.
- Ni Eidhin D, Perkins S, Francois P, Vaudaux P, Hook M, et al. (1998) Clumping factor B (ClfB), a new surface-located fibrinogen-binding adhesin of *Staphylococcus aureus*. *Mol Microbiol* 30: 245–257.
- Walsh EJ, Miajlovic H, Gorkun OV, Foster TJ (2008) Identification of the *Staphylococcus aureus* MSCRAMM clumping factor B (ClfB) binding site in the alphaC-domain of human fibrinogen. *Microbiology* 154: 550–558.
- George NP, Wei Q, Shin PK, Konstantopoulos K, Ross JM (2006) *Staphylococcus aureus* adhesion via Spa, ClfA, and SdrCDE to immobilized platelets demonstrates shear-dependent behavior. *Arterioscler Thromb Vasc Biol* 26: 2394–2400.
- Fitzgerald JR, Loughman A, Keane F, Brennan M, Knobel M, et al. (2006) Fibronectin-binding proteins of *Staphylococcus aureus* mediate activation of human platelets via fibrinogen and fibronectin bridges to integrin GPIIb/IIIa and IgG binding to the Fc gammaRIIIa receptor. *Mol Microbiol* 59: 212–230.
- Simpson KH, Bowden G, Hook M, Anvari B (2003) Measurement of adhesive forces between individual *Staphylococcus aureus* MSCRAMMs and protein-coated surfaces by use of optical tweezers. *J Bacteriol* 185: 2031–2035.
- Lee SY, Kim KK, Choe SJ (2001) Binding of oral streptococci to human fibrinogen. *Oral Microbiol Immunol* 16: 88–93.
- Reuterswaid A, Miorner H, Wagner M, Kronvall G (1985) Variations in binding of mammalian fibrinogens to streptococci groups A, B, C, E, G and to *Staphylococcus aureus*. *Acta Pathol Microbiol Immunol Scand B* 93: 77–82.
- Kuusela P, Vartiö T, Vuento M, Myhre EB (1985) Attachment of staphylococci and streptococci on fibronectin, fibronectin fragments, and fibrinogen bound to a solid phase. *Infect Immun* 50: 77–81.
- Pietrocola G, Schubert A, Visai L, Torti M, Fitzgerald JR, et al. (2005) FbsA, a fibrinogen-binding protein from *Streptococcus agalactiae*, mediates platelet aggregation. *Blood* 105: 1052–1059.
- Herzberg MC, Nobbs A, Tao L, Kilic A, Beckman E, et al. (2005) Oral streptococci and cardiovascular disease: searching for the platelet aggregation-

- associated protein gene and mechanisms of *Streptococcus sanguis*-induced thrombosis. *J Periodontol* 76: 2101–2105.
32. Kerrigan SW, Douglas I, Wray A, Heath J, Byrne MF, et al. (2002) A role for glycoprotein Ib in *Streptococcus sanguis*-induced platelet aggregation. *Blood* 100: 509–516.
  33. Douglas CW, Brown PR, Preston FE (1990) Platelet aggregation by oral streptococci. *FEMS Microbiol Lett* 60: 63–67.
  34. Courtney HS, Dale JB, Hasty DL (2002) Mapping the fibrinogen-binding domain of serum opacity factor of group A streptococci. *Curr Microbiol* 44: 236–240.
  35. Heilmann C, Hartleib J, Hussain MS, Peters G (2005) The multifunctional *Staphylococcus aureus* autolysin Aaa mediates adherence to immobilized fibrinogen and fibronectin. *Infect Immun* 73: 4793–4802.
  36. Heilmann C, Thumm G, Chhatwal GS, Hartleib J, Uekotter A, et al. (2003) Identification and characterization of a novel autolysin (Aac) with adhesive properties from *Staphylococcus epidermidis*. *Microbiology* 149: 2769–2778.
  37. Brouillette E, Lacasse P, Shkreta L, Belanger J, Grondin G, et al. (2002) DNA immunization against the clumping factor A (ClfA) of *Staphylococcus aureus*. *Vaccine* 20: 2348–2357.
  38. Entenza JM, Moreillon P, Senn MM, Kormanec J, Dunman PM, et al. (2005) Role of sigmaB in the expression of *Staphylococcus aureus* cell wall adhesins ClfA and FnbA and contribution to infectivity in a rat model of experimental endocarditis. *Infect Immun* 73: 990–998.
  39. Sullam PM, Valone FH, Mills J (1987) Mechanisms of platelet aggregation by viridans group streptococci. *Infect Immun* 55: 1743–1750.
  40. Dhawan VK, Yeaman MR, Cheung AL, Kim E, Sullam PM, et al. (1997) Phenotypic resistance to thrombin-induced platelet microbicidal protein *in vitro* is correlated with enhanced virulence in experimental endocarditis due to *Staphylococcus aureus*. *Infect Immun* 65: 3293–3299.
  41. Cheung AL, Eberhardt KJ, Chung E, Yeaman MR, Sullam PM, et al. (1994) Diminished virulence of a *sar-/agr-* mutant of *Staphylococcus aureus* in the rabbit model of endocarditis. *J Clin Invest* 94: 1815–1822.
  42. A C, SG R, I L, J O (2003) Bacteria-binding plasma proteins in pellicles formed on hydroxyapatite *in vitro* and on teeth *in vivo*. *Oral Microbiology Immunology* 18: 203–207.
  43. Nagata H, Murakami Y, Inoshita E, Shizukuishi S, Tsunemitsu A (1990) Inhibitory effect of human plasma and saliva on co-aggregation between *Bacteroides gingivalis* and *Streptococcus mitis*. *J Dent Res* 69: 1476–1479.
  44. Yasmin A, Kenny JG, Shankar J, Darby AC, Hall N, et al. (2010) Comparative genomics and transduction potential of *Enterococcus faecalis* temperate bacteriophages. *J Bacteriol* 192: 1122–1130.
  45. Romero P, Croucher NJ, Hiller NL, Hu FZ, Ehrlich GD, et al. (2009) Comparative genomic analysis of ten *Streptococcus pneumoniae* temperate bacteriophages. *J Bacteriol* 191: 4854–4862.
  46. Chaffin DO, C.E. R (1998) Blue/white screening of recombinant plasmids in Gram-positive bacteria by interruption of alkaline phosphatase gene (phoZ) expression. *Gene* 219: 91–99.
  47. van de Rijn I, Kessler RE (1980) Growth characteristics of group A streptococci in a new chemically defined medium. *Infect Immun* 27: 444–448.
  48. Dillard JP, Vandersea MW, Yother J (1995) Characterization of the cassette containing genes for type 3 capsular polysaccharide biosynthesis in *Streptococcus pneumoniae*. *J Exp Med* 181: 973–983.
  49. Yother J, Leopold K, White J, Fischer W (1998) Generation and properties of a *Streptococcus pneumoniae* mutant which does not require choline or analogs for growth. *J Bacteriol* 180: 2093–2101.
  50. Harmon JT, Greco NJ, Jamieson GA (1992) Isolation of human platelet plasma membranes by glycerol lysis. *Methods Enzymol* 215: 32–36.
  51. Siboo IR, Chambers HF, Sullam PM (2005) Role of SraP, a Serine-Rich Surface Protein of *Staphylococcus aureus*, in binding to human platelets. *Infect Immun* 73: 2273–2280.
  52. Seo HS, Cartee RT, Pritchard DG, Nahm MH (2008) A new model of pneumococcal lipoteichoic acid structure resolves biochemical, biosynthetic, and serologic inconsistencies of the current model. *J Bacteriol* 190: 2379–2387.
  53. Seo HS, Michalek SM, Nahm MH (2008) Lipoteichoic acid is important in innate immune responses to Gram-positive bacteria. *Infect Immun* 76: 206–213.
  54. Xiong YQ, Bensing BA, Bayer AS, Chambers HF, Sullam PM (2008) Role of the serine-rich surface glycoprotein GspB of *Streptococcus gordonii* in the pathogenesis of infective endocarditis. *Microb Pathog* 45: 297–301.
  55. Gianfaldoni C, Censini S, Hilleringmann M, Moschioni M, Facciotti C, et al. (2007) *Streptococcus pneumoniae* pilus subunits protect mice against lethal challenge. *Infect Immun* 75: 1059–1062.
